# MinION sequencing of seafood in Singapore reveals creatively labelled flatfishes, confused roe, pig DNA in squid balls, and phantom crustaceans

Jonathan K. I. Ho<sup>1,#</sup>, Jayanthi Puniamoorthy<sup>1#</sup>, Amrita Srivathsan<sup>1\*</sup>, Rudolf Meier<sup>1\*</sup>

1. Department of Biological Sciences, National University of Singapore, 14 Science Drive 4, Singapore 117543

\* Corresponding authors, [meier@nus.edu.sg](mailto:meier@nus.edu.sg), [asrivathsan@gmail.com](mailto:asrivathsan@gmail.com)

# First authors

Keywords: mislabelling, fraud, food safety, DNA barcoding

## Abstract

Food mislabelling is a growing world-wide problem that is increasingly addressed through the authentication of ingredients via techniques like mass spectrometry or DNA-sequencing. However, traditional DNA sequencing methods are slow, expensive, and require well-equipped laboratories. We here test whether these problems can be overcome through the use of Nanopore sequencing. We sequenced 92 single and 13 mixed-species samples bought in supermarkets and restaurants in Singapore which has a large and diverse seafood trade. We successfully obtained DNA barcodes for 94% and 100% of the single- and mixed-species products after correcting the numerous sequencing errors of MinION reads with a correction pipeline optimized for DNA barcodes. We find comparatively low levels of clear-cut mislabelling for single-species samples (7.6 %) while the rates are higher for mixed-species samples (38.5 %). These low rates are somewhat deceptive, however, because of the widespread use of vague common species names that do not allow for a precise assessment of the expected ingredients. With regard to the clearly mislabelled single-species products, higher-value products (e.g., prawn roe, wild-caught Atlantic salmon, halibut) are replaced with lower-value ingredients (e.g., fish roe, Pacific salmon, arrowtooth flounder) while more serious problems are observed for mixed-species samples. Cuttlefish and prawn balls repeatedly contained pig DNA and 100% of all mixed samples labelled as containing crustaceans ('crab', 'prawn', 'lobster') only yielded fish barcodes. We conclude that there is a need for more regular testing of seafood samples and suggest that due to speed and low-cost, MinION would be a good instrument for this purpose. We also emphasize the need for developing clearer labelling guidelines.

## 1. Introduction

In today's globalised economy, seafood readily moves across borders. Fish caught in the Arctic and the Antarctic is served in restaurants on the equator, while scallops, oysters, and sea cucumbers harvested from the shores of North America satisfy the ever-increasing

demand of consumers in East Asia. This increased demand has also led to the expansion of seafood farming worldwide. However, increased demand has also created incentives for seafood fraud via mislabelling. Such fraud is particularly common for fillets and heavily processed seafood products because they are not readily identifiable by eye (Boughattas, Le Fur, & Karoui, 2019; Carvalho, Palhares, Drummond, & Gadanho, 2017; Di Pinto et al., 2013; Giusti, Armani, & Sotelo, 2017; Veneza et al., 2018).

In recent years, seafood fraud and mislabelling have attracted much attention and the scope of the problem has become more apparent. This is partly because new technologies have made it easier to detect fraud. Most fraud appears driven by the desire to maximize profit because profit margins can be significantly increased by substituting expensive and desirable food species with less desirable and cheaper ones. For example, tilapia (*Oreochromis* spp.) or pangasius (*Pangasianodon hypophthalmus*) are occasionally sold as more expensive fish such as snapper or cod (Hu, Huang, Hanner, Levin, & Lu, 2018; Kappel & Schröder, 2015; Khaksar et al., 2015; Nagalakshmi, Annam, Venkateshwarlu, Pathakota, & Lakra, 2016; Pardo et al., 2018). Similarly, farmed Atlantic salmon (*Salmo salar*) is sold as wild-caught Pacific salmon (*Onchorhynchus* spp.) (Cline, 2012), and farmed rainbow trout (*Oncorhynchus mykiss*) as wild-caught brown trout (*Salmo trutta*) (Muñoz-Colmenero, Juanes, Dopico, Martinez, & Garcia-Vazquez, 2017).

But seafood mislabelling is sometimes more than “just” consumer fraud. It can also affect food safety when toxic or unpalatable species such as pufferfish or escolar enter the market by relabelling them as palatable species (Huang et al., 2014; Lowenstein, Amato, & Kolokotronis, 2009; Xiong et al., 2018). In addition, mislabelling frequently interferes with the conservation of species and populations when they are sold although they are protected by law (Almerón-Souza et al., 2018; Marko et al., 2004; Marko, Nance, & Guynn, 2011; Wainwright et al., 2018). Finally, an additional and underappreciated problem is that mislabelled food may contain ingredients that violate religious rules or ethical preferences, given that the consumption of some ingredients are disallowed or discouraged by specific religions.

The number of studies examining seafood fraud have increased greatly in recent years (Cawthorn, Baillie, & Mariani, 2018; Harris, Rosado, & Xavier, 2016; Pardo et al., 2018; Shehata, Bourque, Steinke, Chen, & Hanner, 2019). Several methods have been developed that are able to identify the ingredients of commercially sold seafood. This includes chromatographic, spectroscopic, proteomic and genetic methods. Protein-based methods are particularly well-established for the identification of commonly traded fish species. They were the first molecular method for identifying ingredients of seafood products to species and they remain very popular in the form of mass spectroscopy (MS) which has the advantages of being fast and comparatively low-cost (Black et al., 2017; Mazzeo & Siciliano, 2016; Stahl & Schröder, 2017; Wulff, Nielsen, Deelder, Jessen, & Palmblad, 2013). However, identification requires comprehensive databases of MS profiles for the traded seafood, which are difficult to develop for rare species, heavily processed samples, and samples consisting of mixtures of multiple species.

For these reasons, genetic methods have recently received more attention. They have high accuracy and specificity (Haynes, Jimenez, Pardo, & Helyar, 2019) and benefit from the large number of seafood species that have been characterized with DNA barcodes. Genetic testing of seafood ingredients generally relies on the standard DNA barcode for animals; i.e., an approximately 650bp long segment of the mitochondrial cytochrome oxidase I (COI) gene. Reference sequences for this barcode are available for a large number of commercially traded species. This has the advantage that most sequences obtained from seafood products can be assigned to species or species-groups. In addition, mixed- and heavily processed samples can still be characterized because they still contain trace amounts of DNA. However, DNA barcodes are only slowly becoming popular for food authentication because of the comparatively high cost of sequencing when they are obtained with Sanger sequencing (e.g., cost per barcode at the Canadian Centre for DNA barcoding is USD 17: <http://ccdb.ca/pricing/>). Furthermore, Sanger sequencing does not allow for sequencing products that contain signals from multiple species. Fortunately, these problems can be overcome by using new sequencing methods that are often collectively referred to as Next-Generation sequencing (NGS) or High Throughput Sequencing technologies (HTS). DNA barcodes obtained on platforms such as Illumina, Ion Torrent, and PacBio have been used for food authentication (Carvalho et al., 2017; Giusti et al., 2017; Xing et al., 2019), but they have several disadvantages. The equipment and maintenance cost for Illumina and PacBio instruments are so high that these sequencers are mostly found in sequencing centres that have fairly long turnaround times for submitted samples. In addition, due to the high cost of flowcells, the cost per DNA barcode is high unless thousands of products are sequenced at a time (Ho, Foo, Yeo, & Meier, 2019; Kutty et al., 2018; Srivathsan et al., 2018; Wang, Srivathsan, Foo, Yamane, & Meier, 2018; Yeo, Puniamoorthy, Ngiam, & Meier, 2018).

Fortunately, these issues can now be addressed with Oxford Nanopore sequencing which is implemented on small and portable MinION™ sequencers. This technology could potentially have three key advantages for food authentication. Firstly, the sequencer and the flowcells are sufficiently inexpensive to make them suitable for routine testing in many laboratories and regulatory agencies. In addition, the cost per sample is quickly dropping because recent advances in bioinformatic pipeline now allow for obtaining up to 3500 barcodes on a single standard flowcell (Srivathsan et al., 2018). Furthermore, even less expensive flowcells with lower capacity have become available that will be suitable for processing a few hundred samples. Secondly, obtaining barcodes with MinION requires minimal lab equipment and the data can even be obtained under difficult field conditions ranging from hot, humid tropical rainforest (Pomerantz et al., 2018; Schilthuizen et al., 2019) to freezing Antarctic habitats (Johnson, Zaikova, Goerlitz, Bai, & Tighe, 2017). This is why MinION is not only suitable for rapid species discovery (Schilthuizen et al., 2019; Srivathsan et al., 2018, 2019) but also for identifying species under challenging circumstances (Blanco et al., 2019; Parker, Helmstetter, Devey, Wilkinson, & Papadopulos, 2017; Pomerantz et al., 2018). Lastly, MinION devices generate data within minutes of loading a flowcell and allow for data collection in real-time. Given all these advantages, one may ask why MinION sequencers are not the default for food authentication with DNA sequences. Presumably, the main reason is

the high sequencing error rate of 10-15% (Wick, Judd, & Holt, 2019), but fortunately these errors can now be effectively corrected using a range of new bioinformatics pipelines that are optimized for obtaining animal barcodes with nanopore sequencers (Maestri et al., 2019; Srivathsan et al., 2018).

Currently, MinION sequencing has apparently only been used in one study addressing seafood authentication (Voorhuijzen-Harink et al., 2019). It compared the accuracy of MinION results with those of other high-throughput sequencing techniques and found them to be similar. However, the study did not examine seafood products sold commercially and only examined two artificially mixed samples. The study also predated recently improved bioinformatics pipelines for obtaining DNA barcodes with MinION (Srivathsan et al., 2019). These limitations are here overcome by studying >100 samples of seafood sold in Singapore. The data are analysed using these newly developed techniques and we analyse both single- and mixed-species samples using two different primer pairs. Our study furthermore contributes to the still very limited amount of information available on the prevalence of seafood fraud in Southeast Asia (Labrador, Agmata, Palermo, Follante, & Pante, 2019; Sarmiento, Pereda, Ventolero, & Santos, 2018; Sultana et al., 2018; Too, Adibah, Danial Hariz, & Siti Azizah, 2016; Tran, Nguyen, Nguyen, & Guiguen, 2018). Note that Singapore is a good area for developing seafood authentication methods because it is a very large seafood market. The city state imported 129,439 tonnes of seafood in 2017 (70% being fish and 30% being other seafood), while only producing 6,498 tonnes (91% fish and 9% other seafood) (Agri-Food and Veterinary Authority, 2018). Average per capita consumption is an estimated 21 kg (71% fish and 29% other seafood), which is slightly above the world average of 20.5 kg (FAO, 2018). Overall, Singapore residents obtain nearly 30% of their animal protein from seafood, yet seafood products purchased in Singapore have only been included in two authentication studies. The first established the identity of commercially sold 'snappers' in six English-speaking countries (Cawthorn et al., 2018) while the second examined the species identity of commercially available elasmobranchs. The latter revealed that in Singapore, shark meat (Carcharhinidae) was being sold as Indian threadfin (*Leptomelanosoma indicum*) (Wainwright et al., 2018).

## 2. Materials and Methods

### 2.1 Sample collection

We obtained 105 samples of fresh and frozen seafood from 6 supermarkets (Table 2, Table 3, Table 5) and 2 seafood restaurants (Table 4) in Singapore. All samples were purchased in the first week of May 2018, and each location was visited only once. The products were divided into two categories, single-species products (e.g., frozen fillets) and mixed-species products (e.g., fish or squid balls). All samples did not undergo any cooking or processing after purchase. We tested 92 single-species products (21 from restaurants and 71 from supermarkets) and 13 mixed-species products (all from supermarkets).

### 2.2 DNA extraction and PCR

DNA extraction was conducted using an automated extraction system (Bioer Automatic Nucleic Acid Purification system) using MagaBio plus Tissue Genomic DNA purification kit using the manufacturer's protocols. Afterwards, we amplified two barcodes that differed in length. In order to obtain full length DNA barcodes, we used a COI-3 primer cocktail (C\_FishF1t1–C\_FishR1t1, (Ivanova, Zemlak, Hanner, & Hebert, 2007)), while a shorter mini-barcode (313 bp) was obtained using m1COLintF: 5'-GGWACWGGWTGAACWGTWTAYCCYCC-3' (Leray et al., 2013) and a modified jgHCO2198: 5'-TANACYTCNGGRTGNCCRAARAAYCA-3' (Geller, Meyer, Parker, & Hawk, 2013). In order to multiplex a large number of samples in a single MinION run, we adopted a tagged amplicon strategy (Meier et al. 2016) where each primer was tagged with a 13-bp unique sequence at the 5' end of the primer. Eleven forward and ten reverse tagged primers allowed for the amplification of 110 products using a dual-indexing strategy. For this study we used the tags developed by Srivathsan et al. (2019, F: HL001-HL011, R: HL001-HL010) and the PCR conditions for all amplifications were as follows: 8 µl Mastermix (CWBio), 7.84 µl molecular grade H<sub>2</sub>O, 0.16 µl of 25mM MgCl<sub>2</sub>, 1 µl of 1 mg/ml BSA, 1 µl of each primer, and 1 µl of sample DNA. The PCR conditions were 5 min initial denaturation at 94°C followed by 35 cycles of denaturation at 94°C (1 min), 47°C (2 min), 72°C (5 min), followed by final extension of 72°C (5 min). PCR products were pooled in equal volumes for library preparation and MinION sequencing. The libraries were prepared using SQK-LSK108 kit as per instructions using 1 µg of starting DNA. The only modification to the protocol recommendation by the manufacturer was the use of 1X Ampure beads for clean-up instead of the customarily recommended 0.4X. Sequencing was carried out using MinION R9.4.1 over 24 hours.

### 2.3 Bioinformatics

The nanopore reads were base-called in real-time using MinKNOW. The resulting fastq file was converted to a fasta file and the data were processed using *miniBarcoder* (Srivathsan et al., 2018, 2019). In short, the reads were split into two sets based on lengths (1) 300-600 bp and (2) >600 bp. The first read set was demultiplexed to obtain sequences corresponding to the COI minibarcode while the second read set included the reads pertaining to the full-length barcode. For this set, we first demultiplexed the reads using one pair of primers (FishF2\_t1 and FishR2\_t1) that were then removed from the read set. Next we used the second pair of primers (VF2\_t1- FR1d\_t1) for demultiplexing the remaining reads in the second set. The average coverage for two combinations was >1000 X (median 770X) with all specimens having >10X coverage. Hence, we did not proceed to recover additional reads by demultiplexing the remaining primer combinations.

A bioinformatics pipeline for single-species barcodes from sets of reads developed by Srivathsan et al. (2018, 2019) was used here. Briefly, it first obtains a "MAFFT barcode" by aligning the reads using MAFFT (Katoh & Standley, 2013) and obtaining a majority rule consensus with subsequent removal of gaps. These MAFFT barcodes are further corrected using RACON (Vaser, Sovic, Nagarajan, & Sikic, 2017) to generate a second set of consensus barcodes. The MAFFT and RACON barcodes are then corrected for indel errors based on amino-acid translations. Lastly these barcode sets are consolidated to obtain final barcodes.



For mixed species products, we modified the bioinformatics procedures. For each sample, the demultiplexed reads were matched by BLAST to GenBank (e-value threshold of 1e-5). The BLAST matches were then parsed using *readsidentifier* (Srivathsan, Sha, Vogler, & Meier, 2015) to summarize the taxonomy using the Lowest Common Ancestor approach and retaining only the best scoring matches. Read sets were grouped by genus, and the abovementioned pipeline was used to obtain a consensus barcode for each genus specific read set. This approach was also applied to read sets for samples for which we failed to get clean barcodes using the single-species approach. This is because bacterial signals can be co-amplified with a seafood product, and a clean barcode sequence can only be obtained after the removal of the bacterial reads.

All barcode sequences were matched by BLAST to NCBI NT database and the 50 best matches were retrieved. These were aligned with the barcode datasets using MAFFT and queried with SpeciesIdentifier (Meier, Shiyang, Vaidya, Ng, & Hedin, 2006) to find the best matching sequence.

### 3. Results and Discussion

#### 3.1. Amplification success

The use of two different sets of primers amplifying the full-length and a mini-barcode of 313bp length allowed us to obtain sequences for 87/92 (94.5%) of the single-species and 13/13 (100%) of the mixed-species products. These barcodes were derived from 158,329 short and 91,901 long nanopore reads that were successfully demultiplexed into read sets representing the different amplicons. This overall high success rate is due to combining the data for both amplicons. We obtained mini-barcodes for 72 and full-length barcodes for 70 of the 92 single-species samples, but only 55 samples (60%) have data for both. We thus strongly recommend the use of different primer sets in order to increase the overall success rates. The usage of two different PCR reactions furthermore helps with overcoming potential primer biases and allows for cross-validation. For example, one sample (FM095) was expected to contain frozen scallop but a prawn DNA barcode was obtained when using the full-length primer cocktail. In contrast, the mini-barcode reads revealed the expected scallop signal. Once this sample is excluded from the analysis, our total success rate for single-species products is 93.4%, since no other samples failed this cross validation. Note that for mixed products, the success rates were higher than for single-species products. This applies to both sets of primers (12 of 13 samples had at least one sequence successfully barcoded) and was surprising because we had expected that such samples would be more difficult to sequence. By matching the barcodes to publicly available reference sequences, we classified seven single-species samples (7.6%: Table 2) and five mixed species samples (Table 5) as being clearly mislabelled. However, we submit that an additional seven mixed-species samples are borderline mislabelled and the labelling could be considered fraudulent if stricter rules were applied to the equivalence of scientific and common names.

#### 3.2. Identification of seafood samples

Several of the clear-cut cases of mislabelling involved flatfish for which about 40% of all single-species samples were affected (3 out of 7). This includes two cases of halibut

(*Hippoglossus* sp.) being substituted by arrowtooth flounder (*Atheresthes stomias*) and one sample of sole (*Solea* sp.) being substituted by Indian halibut (*Psettodes erumei*). Similar to cases reported elsewhere in the literature, salmon were also targeted with two samples of chum salmon (*Onchorhynchus keta*) being sold as wild-caught Atlantic salmon (*Salmo salar*). We also found that one sample of capelin roe (*Mallotus villosus*) was sold as prawn roe. Arguably, the most serious case of mislabelling for a multi-religious society like Singapore involved pig DNA in cuttlefish and prawn balls. We initially suspected lab contamination, but the same seafood brand repeatedly yielded pig DNA in five samples which were bought at different times and places. Pig DNA was also consistently amplified by both primer sets and were not found in any of the other seafood samples. This ingredient in a seafood product is a serious problem given that many consumers avoid pork for religious, ethical, or health reasons (e.g., allergies). Fortunately, the samples were not labelled as *halal* or *kosher*, but such cases do highlight the need for regular testing of heavily processed, multi-species seafood samples. Note that a similar case of pig DNA in seafood balls had also recently been reported from the Philippines (marketed as fish, squid, or shrimp balls). These seafood balls also included chicken meat (Sarmiento et al., 2018).

In most mislabelling cases, the substituted product was less valuable than the species indicated on the label. For example, halibut is a more highly valued fish compared to arrowtooth flounder, which tends to develop a soft and mushy texture when cooked (Greene & Babbitt, 1990). Arrowtooth flounder is found throughout the Eastern Pacific, from the Bering Sea to the coast of Baja California. Historically, it was not targeted by commercial fisheries because it was considered unpalatable, but new technology and population declines of other species have led to the exploitation of arrowtooth flounder populations (Grandin & Forrest, 2017). However, this does not change the fact that arrowtooth flounder can at best be considered a ‘low-value’ or even ‘nuisance’ species (Kasperski, 2016). Yet, it is starting to regularly show up in mislabelling studies, with recent cases reported from Brazil (Carvalho, Palhares, Drummond, & Frigo, 2015) and China (Xiong et al., 2016). We submit that explicit regulation is needed that requires that arrowtooth flounder be labelled as such. In addition, fast detection techniques targeting this species should be developed.

Not surprisingly, other cases of mislabelling involved salmon. “Wild-caught” Atlantic salmon (*Salmo salar*) was found to be chum salmon (*Onchorhynchus keta*). The latter species usually commands a lower price than wild-caught king or coho salmon (*O. tshawytscha*; *O. kisutch*) (Alaska Department of Fish and Game, 2018). This is presumably due to the fact that the commercial fishery for wild Atlantic salmon has now virtually collapsed due to significant population declines. Worldwide, the mislabelling of salmon usually involves farmed *S. salar* labelled as wild caught *Onchorhynchus* sp. or less valuable species of *Onchorhynchus* being substituted by more valuable ones (Cline, 2012; Muñoz-Colmenero et al., 2017; Warner et al., 2015). It appears that Singapore’s case of *O. keta* being labelled as “wild-caught” *S. salar* is a new addition to the numerous mislabelling problems in *Salmo* and *Onchorhynchus*.

Many mixed-species products were labelled as ‘crab’, ‘prawn’, or ‘lobster’ sticks or balls. Only fish were listed as ingredients in 6 out of 8 mixed-species samples while two more

explicitly listed shrimp meat or prawn powder in addition to fish in their ingredients. However, we were unable to find any crustacean DNA in all eight samples. Fish DNA was abundant and we suspect that overall, many of these products do not include any or only minuscule amounts of crustacean tissues. One additional sample, which was simply labelled ‘crab legs’ without any ingredient list and was treated as a single-species product, proved to only contain fish DNA as well. One way or another, we submit that the average consumer would consider extremely low proportions of crustacean protein to be unacceptable given that the label highlights the crustacean component (‘crab’, ‘prawn’, ‘lobster’). This is in contrast to cuttlefish balls which usually contained cephalopods, usually from the cuttlefish genus *Sepia*. We suggest that this ‘creative labelling’ misleads consumers because the main product label indicates crustacean content and the fine print needs to be examined in order to determine that the product does not actually contain crustaceans. Note that the lack of crustacean signal is not due to primer biases because we used a mini-barcode primer mix that that is known to amplify a wide range of marine invertebrates; i.e., we would have expected to find crustacean DNA if it had been there.

### 3.3. Implications and suggestions

Overall, our study suggests that the level of clear-cut mislabelling of seafood products in Singapore is not particularly high when compared to results from other Southeast Asian countries. Studies from Malaysia, Vietnam and the Philippines found levels of mislabelling to be around 60% (Sarmiento et al., 2018; Sultana et al., 2018; Tran et al., 2018) with the only outlier study being by Too et al., (2016) who only detected seafood fraud in 16% of the tested seafood products in Malaysia. Unfortunately, establishing a baseline for overall levels of seafood mislabelling in the region is difficult because the studies are not directly comparable due to differences in methodology and sampling criteria. Hence, the next step for understanding and reducing the problem would be developing standardised sampling and analysis criteria. Sampling criteria could be the sales volume of a product (e.g., high-demand species like salmon, grouper, or cod)(Anjali et al., 2019; Cline, 2012; Muñoz-Colmenero et al., 2017; Xiong et al., 2016) or conservation concerns (Logan, Alter, Haupt, Tomalty, & Palumbi, 2008; Marín et al., 2018; Wainwright et al., 2018). Such standardised sampling would allow for a direct comparison across studies and regions. They would also allow for studying seafood mislabelling rates over time.

We would argue that the main problem with Singapore’s seafood products is ‘creative labelling’, especially for heavily processed products. This is likely due to the lack of clear regulations defining which species should be included in products carrying a particular common names. The Sale of Food Act (Cap. 283, RG 1) only states that labels need to provide a name or description which is “sufficient to indicate the true nature of the food”, as well as defining ‘fish’ as any aquatic organism commonly consumed by humans, excluding mammals, but explicitly including crustaceans and molluscs. This rules out egregious cases of mislabelling such as the use of pork in seafood products, but it allows for creative labelling. Arguably, this state of affairs is no longer in line with the expectation of today’s consumers who expect labels to be precise. This suggests that there may be a need for a regulatory update that could follow the example set by the European Union. The EU



mandates that both the commercial and scientific name should be listed and that the commercial name be taken from approved lists published by EU member countries (Regulation (EU) No 1379/2013). The implementation of these rules resulted in a drop in the incidence of mislabelling of commercially sold seafood in EU supermarkets (from ca. 20% to ca. 8%: (Mariani et al., 2015), while countries with less strict laws continue to have mislabelling rates of about 20-30% (Carvalho et al., 2015; Hu et al., 2018; Nagalakshmi et al., 2016). Levels of seafood mislabelling may also drop in Singapore's supermarkets if such legislation were to be enacted. Note, however, that the seafood mislabelling rates in Europe's restaurants did not benefit from the new regulations (Christiansen, Fournier, Hellemans, & Volckaert, 2018; Horreo, Fitze, Jiménez-Valverde, Noriega, & Pelaez, 2019; Pardo et al., 2018), but this may not be a major concern in Singapore where all seafood samples obtained from restaurants were correctly labelled (N=21).

#### 4. Conclusions

Our results suggest that MinION is ready for DNA-based monitoring for seafood. MinION reads can be used to identify key ingredients in single- and multi-species products even if they were heavily processed. We surmise that methods based on MS are likely to be the best choice for the routine identification of single-species samples of common species, but we would argue that DNA sequencing is the most suitable tool for mixed-species samples or samples of rare species lacking MS profiles. Developing better techniques for mixed-sample products is particularly important because some contain ingredients that should be highlighted on the labels while others appear to lack ingredients that are listed. Testing such samples can now be accomplished rapidly with MinION at a reasonable cost. The barcodes in our study still cost ca. USD 10 per sample, but this was an artefact of only sequencing 105 samples on one flowcell. The correct capacity is closer to 1000 samples (Srivathsan et al., 2019) even if two sets of primers are used. Fortunately, sequencing at smaller scales can also be cost-effective because flowcells can be used multiple times. Each re-use lowers the capacity which allows for having flowcells that are suitable for experiments of different sizes. In addition, small-scale projects can be carried out on new, lower-capacity flowcells ("Flongle"). Overall, we would thus predict that the consumable cost of MinION barcodes will be <USD1 per sample. Of course, implementing a fully developed monitoring scheme would require more than just a good sequencing method. It will require well-designed sampling methods, the development of explicit labelling guidelines, user-friendly bioinformatics software, and experimentally determined detection levels for ingredients in mixed-species samples.

#### Acknowledgements:

The authors would like to thank Yuen Huei Khee for help provided in the laboratory, as well as Allie Wharf and Freya Slessor (Make Waves Media) for their help obtaining samples. This work was supported by the South East Asian Biodiversity Genomics (SEABIG) Centre (Grant no: R-154-000-648-646 and R-154-000-648-733).

#### References

- 369 Agri-Food and Veterinary Authority. (2018). *Agri-Food and Veterinary Authority Annual*  
370 *Corporate Report 2017/2018* (p. 97). Retrieved from Agri-Food and Veterinary  
371 Authority website: [https://www.sfa.gov.sg/docs/default-source/publication/annual-](https://www.sfa.gov.sg/docs/default-source/publication/annual-report/ava-ar-2017-18.pdf)  
372 [report/ava-ar-2017-18.pdf](https://www.sfa.gov.sg/docs/default-source/publication/annual-report/ava-ar-2017-18.pdf)
- 373 Alaska Department of Fish and Game. (2018). Commercial Salmon Fishery Wholesale Prices,  
374 Alaska Department of Fish and Game. Retrieved July 12, 2019, from  
375 <http://www.adfg.alaska.gov/index.cfm?adfg=commercialbyfisherysalmon.salmoncat>  
376 [ch\\_wholesale](http://www.adfg.alaska.gov/index.cfm?adfg=commercialbyfisherysalmon.salmoncat)
- 377 Almerón-Souza, F., Sperb, C., Castilho, C. L., Figueiredo, P. I. C. C., Gonçalves, L. T., Machado,  
378 R., ... Fagundes, N. J. R. (2018). Molecular identification of shark meat from local  
379 markets in southern Brazil based on DNA barcoding: evidence for mislabeling and  
380 trade of endangered species. *Frontiers in Genetics*, 9.  
381 <https://doi.org/10.3389/fgene.2018.00138>
- 382 Anjali, K. M., Mandal, A., Gunalan, B., Ruban, L., Anandajothi, E., Thineshsanthar, D., ...  
383 Kandan, S. (2019). Identification of six grouper species under the genus *Epinephelus*  
384 (Bloch, 1793) from Indian waters using PCR-RFLP of cytochrome c oxidase I (COI)  
385 gene fragment. *Food Control*, 101, 39–44.  
386 <https://doi.org/10.1016/j.foodcont.2019.02.024>
- 387 Black, C., Chevallier, O. P., Haughey, S. A., Balog, J., Stead, S., Pringle, S. D., ... Elliott, C. T.  
388 (2017). A real time metabolomic profiling approach to detecting fish fraud using  
389 rapid evaporative ionisation mass spectrometry. *Metabolomics*, 13(12), 153.  
390 <https://doi.org/10.1007/s11306-017-1291-y>
- 391 Blanco, M. B., Greene, L. K., Williams, R. C., Andrianandrasana, L., Yoder, A. T., & Larsen, P.  
392 A. (2019). Next-generation in situ conservation and educational outreach in  
393 Madagascar using a mobile genetics lab. *BioRxiv*. Retrieved from  
394 <https://www.biorxiv.org/content/10.1101/650614v2>
- 395 Boughattas, F., Le Fur, B., & Karoui, R. (2019). Identification and quantification of tuna  
396 species in canned tunas with sunflower medium by means of a technique based on  
397 front face fluorescence spectroscopy (FFFS). *Food Control*, 101, 17–23.  
398 <https://doi.org/10.1016/j.foodcont.2019.02.003>
- 399 Carvalho, D. C., Palhares, R. M., Drummond, M. G., & Frigo, T. B. (2015). DNA barcoding  
400 identification of commercialized seafood in South Brazil: A governmental regulatory  
401 forensic program. *Food Control*, 50, 784–788.  
402 <https://doi.org/10.1016/j.foodcont.2014.10.025>
- 403 Carvalho, D. C., Palhares, R. M., Drummond, M. G., & Gadanho, M. (2017). Food  
404 metagenomics: Next generation sequencing identifies species mixtures and  
405 mislabeling within highly processed cod products. *Food Control*, 80, 183–186.  
406 <https://doi.org/10.1016/j.foodcont.2017.04.049>
- 407 Cawthorn, D.-M., Baillie, C., & Mariani, S. (2018). Generic names and mislabeling conceal  
408 high species diversity in global fisheries markets. *Conservation Letters*, 11(5),  
409 e12573. <https://doi.org/10.1111/conl.12573>
- 410 Christiansen, H., Fournier, N., Hellemans, B., & Volckaert, F. A. M. (2018). Seafood  
411 substitution and mislabeling in Brussels' restaurants and canteens. *Food Control*, 85,  
412 66–75. <https://doi.org/10.1016/j.foodcont.2017.09.005>
- 413 Cline, E. (2012). Marketplace substitution of Atlantic salmon for Pacific salmon in  
414 Washington State detected by DNA barcoding. *Food Research International*, 45(1),  
415 388–393. <https://doi.org/10.1016/j.foodres.2011.10.043>

- Di Pinto, A., Di Pinto, P., Terio, V., Bozzo, G., Bonerba, E., Ceci, E., & Tantillo, G. (2013). DNA barcoding for detecting market substitution in salted cod fillets and battered cod chunks. *Food Chemistry*, 141(3), 1757–1762. <https://doi.org/10.1016/j.foodchem.2013.05.093>
- FAO. (2018). *The State of World Fisheries and Aquaculture 2018 - Meeting the sustainable development goals*. (p. 210). Retrieved from Food and Agriculture Organization of the United Nations website: <http://www.fao.org/3/i9540en/i9540en.pdf>
- Geller, J., Meyer, C., Parker, M., & Hawk, H. (2013). Redesign of PCR primers for mitochondrial cytochrome c oxidase subunit I for marine invertebrates and application in all-taxa biotic surveys. *Molecular Ecology Resources*, 13(5), 851–861. <https://doi.org/10.1111/1755-0998.12138>
- Giusti, A., Armani, A., & Sotelo, C. G. (2017). Advances in the analysis of complex food matrices: Species identification in surimi-based products using Next Generation Sequencing technologies. *PLOS ONE*, 12(10), e0185586. <https://doi.org/10.1371/journal.pone.0185586>
- Grandin, C. J., & Forrest, R. E. (2017). *Arrowtooth flounder (Atheresthes stomias) stock assessment for the west coast of British Columbia* (Canadian Science Advisory Secretariat (CSAS) Research Document No. 2017/025; p. v + 87). Retrieved from Department of Fisheries and Oceans Canada website: [https://www.researchgate.net/publication/319289152\\_Arrowtooth\\_Flounder\\_Atheresthes\\_stomias\\_Stock\\_Assessment\\_for\\_the\\_West\\_Coast\\_of\\_British\\_Columbia](https://www.researchgate.net/publication/319289152_Arrowtooth_Flounder_Atheresthes_stomias_Stock_Assessment_for_the_West_Coast_of_British_Columbia)
- Greene, D. H., & Babbitt, J. K. (1990). Control of muscle softening and protease-parasite interactions in arrowtooth flounder *Atheresthes stomias*. *Journal of Food Science*, 55(2), 579–580. <https://doi.org/10.1111/j.1365-2621.1990.tb06822.x>
- Harris, D. J., Rosado, D., & Xavier, R. (2016). DNA barcoding reveals extensive mislabeling in seafood sold in Portuguese supermarkets. *Journal of Aquatic Food Product Technology*, 25(8), 1375–1380. <https://doi.org/10.1080/10498850.2015.1067267>
- Haynes, E., Jimenez, E., Pardo, M. A., & Helyar, S. J. (2019). The future of NGS (Next Generation Sequencing) analysis in testing food authenticity. *Food Control*, 101, 134–143. <https://doi.org/10.1016/j.foodcont.2019.02.010>
- Ho, J. K. I., Foo, M., Yeo, D., & Meier, R. (2019). The other 99%: exploring the arthropod species diversity of Bukit Timah Nature Reserve, Singapore. *Gardens' Bulletin Singapore*, 71(Suppl 1), 391–417.
- Horreo, J. L., Fitze, P. S., Jiménez-Valverde, A., Noriega, J. A., & Pelaez, M. L. (2019). Amplification of 16S rDNA reveals important fish mislabeling in Madrid restaurants. *Food Control*, 96, 146–150. <https://doi.org/10.1016/j.foodcont.2018.09.020>
- Hu, Y., Huang, S. Y., Hanner, R., Levin, J., & Lu, X. (2018). Study of fish products in Metro Vancouver using DNA barcoding methods reveals fraudulent labeling. *Food Control*, 94, 38–47. <https://doi.org/10.1016/j.foodcont.2018.06.023>
- Huang, Y.-R., Yin, M.-C., Hsieh, Y.-L., Yeh, Y.-H., Yang, Y.-C., Chung, Y.-L., & Hsieh, C.-H. E. (2014). Authentication of consumer fraud in Taiwanese fish products by molecular trace evidence and forensically informative nucleotide sequencing. *Food Research International*, 55, 294–302. <https://doi.org/10.1016/j.foodres.2013.11.027>
- Ivanova, N. V., Zemlak, T. S., Hanner, R. H., & Hebert, P. D. N. (2007). Universal primer cocktails for fish DNA barcoding. *Molecular Ecology Notes*, 7(4), 544–548. <https://doi.org/10.1111/j.1471-8286.2007.01748.x>

- Johnson, S. S., Zaikova, E., Goerlitz, D. S., Bai, Y., & Tighe, S. W. (2017). Real-time DNA sequencing in the Antarctic Dry Valleys using the Oxford Nanopore sequencer. *Journal of Biomolecular Techniques : JBT*, 28(1), 2–7. <https://doi.org/10.7171/jbt.17-2801-009>
- Kappel, K., & Schröder, U. (2015). Species identification of fishery products in Germany. *Journal Für Verbraucherschutz Und Lebensmittelsicherheit*, 10(1), 31–34. <https://doi.org/10.1007/s00003-015-0988-y>
- Kasperski, S. (2016). Optimal multispecies harvesting in the presence of a nuisance species. *Marine Policy*, 64, 55–63. <https://doi.org/10.1016/j.marpol.2015.11.009>
- Katoh, K., & Standley, D. M. (2013). MAFFT Multiple Sequence Alignment Software Version 7: Improvements in Performance and Usability. *Molecular Biology and Evolution*, 30(4), 772–780. <https://doi.org/10.1093/molbev/mst010>
- Khaksar, R., Carlson, T., Schaffner, D. W., Ghorashi, M., Best, D., Jandhyala, S., ... Amini, S. (2015). Unmasking seafood mislabeling in U.S. markets: DNA barcoding as a unique technology for food authentication and quality control. *Food Control*, 56, 71–76. <https://doi.org/10.1016/j.foodcont.2015.03.007>
- Kutty, S. N., Wang, W., Ang, Y., Tay, Y. C., Ho, J. K. I., & Meier, R. (2018). Next-Generation identification tools for Nee Soon freshwater swamp forest, Singapore. *Gardens' Bulletin Singapore*, 70(Suppl. 1), 155–173. [https://doi.org/10.26492/gbs70\(suppl.1\).2018-08](https://doi.org/10.26492/gbs70(suppl.1).2018-08)
- Labrador, K., Agmata, A., Palermo, J. D., Follante, J., & Pante, Ma. J. (2019). Authentication of processed Philippine sardine products using Hotshot DNA extraction and minibarcode amplification. *Food Control*, 98, 150–155. <https://doi.org/10.1016/j.foodcont.2018.11.027>
- Leray, M., Yang, J. Y., Meyer, C. P., Mills, S. C., Agudelo, N., Ranwez, V., ... Machida, R. J. (2013). A new versatile primer set targeting a short fragment of the mitochondrial COI region for metabarcoding metazoan diversity: application for characterizing coral reef fish gut contents. *Frontiers in Zoology*, 10(1), 34. <https://doi.org/10.1186/1742-9994-10-34>
- Logan, C. A., Alter, S. E., Haupt, A. J., Tomalty, K., & Palumbi, S. R. (2008). An impediment to consumer choice: Overfished species are sold as Pacific red snapper. *Biological Conservation*, 141(6), 1591–1599. <https://doi.org/10.1016/j.biocon.2008.04.007>
- Lowenstein, J. H., Amato, G., & Kolokotronis, S.-O. (2009). The real *maccoyii*: identifying tuna sushi with DNA barcodes – contrasting characteristic attributes and genetic distances. *PLOS ONE*, 4(11), e7866. <https://doi.org/10.1371/journal.pone.0007866>
- Maestri, S., Cosentino, E., Paterno, M., Freitag, H., Garces, J. M., Marcolungo, L., ... Delledonne, M. (2019). A rapid and accurate MinION-based workflow for tracking species biodiversity in the field. *Genes*, 10(6), 468. <https://doi.org/10.3390/genes10060468>
- Mariani, S., Griffiths, A. M., Velasco, A., Kappel, K., Jérôme, M., Perez-Martin, R. I., ... Sotelo, C. G. (2015). Low mislabeling rates indicate marked improvements in European seafood market operations. *Frontiers in Ecology and the Environment*, 13(10), 536–540. <https://doi.org/10.1890/150119>
- Marín, A., Serna, J., Robles, C., Ramírez, B., Reyes-Flores, L. E., Zelada-Mázmela, E., ... Alfaro, R. (2018). A glimpse into the genetic diversity of the Peruvian seafood sector: Unveiling species substitution, mislabeling and trade of threatened species. *PLOS ONE*, 13(11), e0206596. <https://doi.org/10.1371/journal.pone.0206596>



- Marko, P. B., Lee, S. C., Rice, A. M., Gramling, J. M., Fitzhenry, T. M., McAlister, J. S., ...  
Moran, A. L. (2004). Fisheries: Mislabelling of a depleted reef fish. *Nature*, 430(6997),  
309–310. <https://doi.org/10.1038/430309b>
- Marko, P. B., Nance, H. A., & Guynn, K. D. (2011). Genetic detection of mislabeled fish from  
a certified sustainable fishery. *Current Biology*, 21(16), R621–R622.  
<https://doi.org/10.1016/j.cub.2011.07.006>
- Mazzeo, M. F., & Siciliano, R. A. (2016). Proteomics for the authentication of fish species.  
*Journal of Proteomics*, 147, 119–124. <https://doi.org/10.1016/j.jprot.2016.03.007>
- Meier, R., Shiyang, K., Vaidya, G., Ng, P. K. L., & Hedin, M. (2006). DNA barcoding and  
taxonomy in Diptera: a tale of high intraspecific variability and low identification  
success. *Systematic Biology*, 55(5), 715–728.  
<https://doi.org/10.1080/10635150600969864>
- Muñoz-Colmenero, M., Juanes, F., Dopico, E., Martinez, J. L., & Garcia-Vazquez, E. (2017).  
Economy matters: A study of mislabeling in salmon products from two regions,  
Alaska and Canada (Northwest of America) and Asturias (Northwest of Spain).  
*Fisheries Research*, 195, 180–185. <https://doi.org/10.1016/j.fishres.2017.07.012>
- Nagalakshmi, K., Annam, P.-K., Venkateshwarlu, G., Pathakota, G.-B., & Lakra, W. S. (2016).  
Mislabeling in Indian seafood: An investigation using DNA barcoding. *Food Control*,  
59, 196–200. <https://doi.org/10.1016/j.foodcont.2015.05.018>
- Pardo, M. Á., Jiménez, E., Viðarsson, J. R., Ólafsson, K., Ólafsdóttir, G., Daniëlsdóttir, A. K., &  
Pérez-Villareal, B. (2018). DNA barcoding revealing mislabeling of seafood in  
European mass caterings. *Food Control*, 92, 7–16.  
<https://doi.org/10.1016/j.foodcont.2018.04.044>
- Parker, J., Helmstetter, A. J., Devey, D., Wilkinson, T., & Papadopoulos, A. S. T. (2017). Field-  
based species identification of closely-related plants using real-time nanopore  
sequencing. *Scientific Reports*, 7(1), 8345. <https://doi.org/10.1038/s41598-017-08461-5>
- Pomerantz, A., Peñafiel, N., Arteaga, A., Bustamante, L., Pichardo, F., Coloma, L. A., ... Prost,  
S. (2018). Real-time DNA barcoding in a rainforest using nanopore sequencing:  
opportunities for rapid biodiversity assessments and local capacity building.  
*GigaScience*, 7(4). <https://doi.org/10.1093/gigascience/giy033>
- Sarmiento, K. P., Pereda, J. M. R., Ventolero, M. F. H., & Santos, M. D. (2018). Not fish in fish  
balls: fraud in some processed seafood products detected by using DNA barcoding.  
*Philippine Science Letters*, 11(01), 7.
- Schilthuizen, M., Clavera, A. P., Khoo, M. S., Bondar, C. A., Elder, C. H. S., Bouma, A. M., ...  
Delledonne, M. (2019). Bringing the lab to the field: a new lowland *Microparmarion*  
semi-slug (Gastropoda: Ariophantidae) described and DNA-barcoded in the forest.  
*Journal of Molluscan Studies*, 85(1), 35–40. <https://doi.org/10.1093/mollus/eyy052>
- Shehata, H. R., Bourque, D., Steinke, D., Chen, S., & Hanner, R. (2019). Survey of mislabelling  
across finfish supply chain reveals mislabelling both outside and within Canada. *Food  
Research International*, 121, 723–729.  
<https://doi.org/10.1016/j.foodres.2018.12.047>
- Srivathsan, A., Baloglu, B., Wang, W., Tan, W. X., Bertrand, D., Ng, A. H. Q., ... Meier, R.  
(2018). A MinION™-based pipeline for fast and cost-effective DNA barcoding.  
*Molecular Ecology Resources*, 18(5), 1035–1049. <https://doi.org/10.1111/1755-0998.12890>



- 555 Srivathsan, A., Hartop, E., Puniamoorthy, J., Lee, W. T., Kutty, S. N., Kurina, O., & Meier, R.  
556 (2019). Rapid, large-scale species discovery in hyperdiverse taxa using 1D MinION  
557 sequencing. *BioRxiv*, 622365. <https://doi.org/10.1101/622365>
- 558 Srivathsan, A., Sha, J. C. M., Vogler, A. P., & Meier, R. (2015). Comparing the effectiveness of  
559 metagenomics and metabarcoding for diet analysis of a leaf-feeding monkey  
560 (*Pygathrix nemaeus*). *Molecular Ecology Resources*, 15(2), 250–261.  
561 <https://doi.org/10.1111/1755-0998.12302>
- 562 Stahl, A., & Schröder, U. (2017). Development of a MALDI–TOF MS-based protein fingerprint  
563 database of common food fish allowing fast and reliable identification of fraud and  
564 substitution. *Journal of Agricultural and Food Chemistry*, 65(34), 7519–7527.  
565 <https://doi.org/10.1021/acs.jafc.7b02826>
- 566 Sultana, S., Ali, Md. E., Hossain, M. A. M., Asing, Naquiah, N., & Zaidul, I. S. M. (2018).  
567 Universal mini COI barcode for the identification of fish species in processed  
568 products. *Food Research International*, 105, 19–28.  
569 <https://doi.org/10.1016/j.foodres.2017.10.065>
- 570 Too, C. C., Adibah, A. B., Danial Hariz, Z. A., & Siti Azizah, M. N. (2016). Detection of  
571 mislabelled seafood products in Malaysia by DNA barcoding: Improving transparency  
572 in food market. *Food Control*, 64, 247–256.  
573 <https://doi.org/10.1016/j.foodcont.2015.11.042>
- 574 Tran, T. T. H., Nguyen, T. H., Nguyen, P. H., & Guiguen, Y. (2018). Species identification using  
575 DNA barcoding on processed pangasid catfish products in Viet Nam revealed important  
576 mislabeling. *Turkish Journal of Fisheries and Aquatic Sciences*, 18(3), 457–462.
- 577 Vaser, R., Sovic, I., Nagarajan, N., & Sikic, M. (2017). Fast and accurate de novo genome  
578 assembly from long uncorrected reads. *Genome Research*, gr.214270.116.  
579 <https://doi.org/10.1101/gr.214270.116>
- 580 Veneza, I., Silva, R., Freitas, L., Silva, S., Martins, K., Sampaio, I., ... Gomes, G. (2018).  
581 Molecular authentication of Pargo fillets *Lutjanus purpureus* (Perciformes:  
582 Lutjanidae) by DNA barcoding reveals commercial fraud. *Neotropical Ichthyology*,  
583 16(1). <https://doi.org/10.1590/1982-0224-20170068>
- 584 Voorhuijzen-Harink, M. M., Hagelaar, R., van Dijk, J. P., Prins, T. W., Kok, E. J., & Staats, M.  
585 (2019). Toward on-site food authentication using nanopore sequencing. *Food*  
586 *Chemistry: X*, 2, 100035. <https://doi.org/10.1016/j.fochx.2019.100035>
- 587 Wainwright, B. J., Ip, Y. C. A., Neo, M. L., Chang, J. J. M., Gan, C. Z., Clark-Shen, N., ... Rao, M.  
588 (2018). DNA barcoding of traded shark fins, meat and mobulid gill plates in Singapore  
589 uncovers numerous threatened species. *Conservation Genetics*, 19(6), 1393–1399.  
590 <https://doi.org/10.1007/s10592-018-1108-1>
- 591 Wang, W. Y., Srivathsan, A., Foo, M., Yamane, S. K., & Meier, R. (2018). Sorting specimen-  
592 rich invertebrate samples with cost-effective NGS barcodes: Validating a reverse  
593 workflow for specimen processing. *Molecular Ecology Resources*, 18(3), 490–501.  
594 <https://doi.org/10.1111/1755-0998.12751>
- 595 Warner, K., Mustain, P., Carolin, C., Disla, C., Kroner, R. G., Lowell, B., & Hirshfield, M.  
596 (2015). *Oceana reveals mislabeling of America's favorite fish: salmon* (p. 20). Oceana.
- 597 Wick, R. R., Judd, L. M., & Holt, K. E. (2019). Performance of neural network basecalling tools  
598 for Oxford Nanopore sequencing. *Genome Biology*, 20(1), 129.  
599 <https://doi.org/10.1186/s13059-019-1727-y>

- Wulff, T., Nielsen, M. E., Deelder, A. M., Jessen, F., & Palmblad, M. (2013). Authentication of fish products by large-scale comparison of tandem mass spectra. *Journal of Proteome Research*, 12(11), 5253–5259. <https://doi.org/10.1021/pr4006525>
- Xing, R.-R., Wang, N., Hu, R.-R., Zhang, J.-K., Han, J.-X., & Chen, Y. (2019). Application of next generation sequencing for species identification in meat and poultry products: A DNA metabarcoding approach. *Food Control*, 101, 173–179. <https://doi.org/10.1016/j.foodcont.2019.02.034>
- Xiong, X., Guardone, L., Giusti, A., Castiglieo, L., Gianfaldoni, D., Guidi, A., & Andrea, A. (2016). DNA barcoding reveals chaotic labeling and misrepresentation of cod (鳕, Xue) products sold on the Chinese market. *Food Control*, 60, 519–532. <https://doi.org/10.1016/j.foodcont.2015.08.028>
- Xiong, X., Yao, L., Ying, X., Lu, L., Guardone, L., Armani, A., ... Xiong, X. (2018). Multiple fish species identified from China's roasted Xue Yu fillet products using DNA and mini-DNA barcoding: Implications on human health and marine sustainability. *Food Control*, 88, 123–130. <https://doi.org/10.1016/j.foodcont.2017.12.035>
- Yeo, D., Puniamoorthy, J., Ngiam, R. W. J., & Meier, R. (2018). Towards holomorphology in entomology: rapid and cost-effective adult–larva matching using NGS barcodes. *Systematic Entomology*, 43(4), 678–691. <https://doi.org/10.1111/syen.12296>

619 Table 1: DNA barcoding data obtained with MinION

620

|                                               | COI full length barcode | COI minibarcode |
|-----------------------------------------------|-------------------------|-----------------|
| Number of reads demultiplexed                 | 158,329                 | 91,901          |
| Coverage (Average/median/range)               | 1508/773/13-14,211      | 875/403/12-6071 |
| Number of single-species sample barcodes      | 70                      | 68              |
| Number of mixed-species samples with barcodes | 14                      | 15              |

621

622 Table 2. Mislabelled single-species samples of seafood products obtained from supermarkets in Singapore. Ambiguities in identification are  
623 separated by slashes.

| Seafood sold/marketed as: (expected species) |                                                                    | ID of barcode (best match %)                                                                                                                                                                                                                                                                                                  |
|----------------------------------------------|--------------------------------------------------------------------|-------------------------------------------------------------------------------------------------------------------------------------------------------------------------------------------------------------------------------------------------------------------------------------------------------------------------------|
| FM027                                        | Premium Halibut fillet ( <i>Hippoglossus</i> sp.)                  | <b>313 bp:</b> <i>Atherethes stomias</i> (100%)<br><b>658 bp:</b> <i>Atherethes stomias</i> (100%)                                                                                                                                                                                                                            |
| FM041                                        | Wild caught Atlantic Salmon boneless fillet ( <i>Salmo salar</i> ) | <b>313 bp:</b> <i>Oncorhynchus keta</i> (100%)<br><b>658 bp:</b> Unsuccessful                                                                                                                                                                                                                                                 |
| FM049                                        | Sole fillet ( <i>Soleidae</i> sp.)                                 | <b>313 bp:</b> <i>Psettodes erumei</i> (100%)<br><b>658 bp:</b> Unsuccessful                                                                                                                                                                                                                                                  |
| FM072                                        | Premium Halibut fillet ( <i>Hippoglossus</i> sp.)                  | <b>313 bp:</b> <i>Atherethes stomias</i> (100%)<br><b>658 bp:</b> <i>Atherethes stomias</i> / <i>A. evermanni</i> (100%)                                                                                                                                                                                                      |
| FM073                                        | Wild-caught Atlantic Salmon boneless fillet ( <i>Salmo salar</i> ) | <b>313/658 bp:</b> <i>Oncorhynchus keta</i> (100%)                                                                                                                                                                                                                                                                            |
| FM074                                        | Crab leg ( <i>Brachyura</i> sp.)*                                  | <b>313 bp:</b><br><i>Nemipterus mesoprion</i> / <i>N. randalli</i> (100%)<br><b>658 bp:</b><br><i>Epinephelus diacanthus</i> (99.85%); <i>Nemipterus mesoprion</i> / <i>N. randalli</i> (100%);<br><i>Panna microdon</i> (99.85%); <i>Priacanthud hamrur</i> / <i>P. prolixus</i> (100%); <i>Scolopsis taenioptera</i> (100%) |

|       |                           |                                             |
|-------|---------------------------|---------------------------------------------|
|       |                           |                                             |
| FM077 | Prawn Roe (Penaeidae sp.) | 313/658 bp: <i>Mallotus villosus</i> (100%) |

\* This product was expected to be single-species but analysis revealed multiple species (separated by semicolons)

Table 3: Correctly labelled single-species samples of seafood products obtained from supermarkets in Singapore. Ambiguities in identification are separated by slashes.

| Seafood sold/marketed as: (expected species) |                                                                   | ID of barcode (best match %)                                                                                          |
|----------------------------------------------|-------------------------------------------------------------------|-----------------------------------------------------------------------------------------------------------------------|
| FM004                                        | White Fish ( <i>Oreochromis</i> sp.)                              | 313 bp: <i>Oreochromis niloticus</i> (100%)<br>658 bp: <i>Oreochromis aureus/mossambicus/niloticus</i> (100%)         |
| FM005                                        | Red Spot Emperor ( <i>Lethrinus lentjan</i> )                     | 313 bp: <i>Lethrinus lentjan</i> (100%)<br>658 bp: Unsuccessful                                                       |
| FM006                                        | Barred Spanish Mackerel ( <i>Scomberomorus commerson</i> )        | 313 bp: <i>Scomberomorus commerson</i> (100%)<br>658 bp: Unsuccessful                                                 |
| FM008                                        | Salmon Fish tail ( <i>Salmo salar</i> / <i>Onchorhynchus</i> sp.) | 313/658 bp: <i>Salmo salar</i> (99.68%/99.85%)                                                                        |
| FM009                                        | Arrowtooth Flounder ( <i>Atheresthes stomias</i> )                | 313/658 bp: <i>Atheresthes evermanni/Atheresthes stomias</i> (100%)                                                   |
| FM011                                        | Red Snapper ( <i>Lutjanus</i> sp.)                                | 313 bp: <i>Lutjanus madras/ophoyusenii/xanthopinnis</i> (100%)<br>658 bp: <i>Lutjanus madras/ophoyusenii</i> (99.85%) |
| FM012                                        | Scallop (Pectenidae sp.)                                          | 313/658 bp: Unsuccessful                                                                                              |
| FM013                                        | White Snapper (Lutjanidae sp.)                                    | 313/658 bp: <i>Pristipomoides multidens</i> (100%/ 99.85%)                                                            |
| FM014                                        | Barramundi ( <i>Lates calcarifer</i> )                            | 313/658 bp: <i>Lates calcifer</i> (100%)                                                                              |
| FM015                                        | Oyster Meat (Ostreidae)                                           | 313/658 bp: Unsuccessful                                                                                              |
| FM017                                        | Grouper ( <i>Epinephelus</i> sp. / <i>Plectropomus</i> sp.)       | 313 bp: <i>Epinephelus sexfasciatus</i> (100%)<br>658 bp: Unsuccessful                                                |

|       |                                                             |                                                                                                                         |
|-------|-------------------------------------------------------------|-------------------------------------------------------------------------------------------------------------------------|
| FM018 | Crab Meat ( <i>Brachyura</i> sp.)                           | <b>313 bp:</b> <i>Monomia gladiator</i> (99.36%)<br><b>658 bp:</b> Unsuccessful                                         |
| FM019 | Toman ( <i>Channa micropeltes</i> )                         | <b>313/658 bp:</b> <i>Channa micropeltes</i> (99.36%/100%)                                                              |
| FM020 | Barramundi ( <i>Lates calcarifer</i> )                      | <b>313 bp:</b> Unsuccessful<br><b>658 bp:</b> <i>Lates calcifer</i> (100%)                                              |
| FM021 | Norwegian Saba Mackerel ( <i>Scombridae</i> )               | <b>313/658 bp:</b> <i>Scomber scombrus</i> (100%)                                                                       |
| FM022 | Blue Swimmer Crab ( <i>Portunus pelagicus</i> )             | <b>313 bp:</b> <i>Portunus pelagicus/reticulatus</i> (100%)<br><b>658 bp:</b> Unsuccessful                              |
| FM023 | Wild caught Alaska Cod ( <i>Gadus</i> sp.)                  | <b>313 bp:</b> <i>Gadus macrocephalus/ogac/morhua</i> (100%)<br><b>658 bp:</b> <i>Gadus macrocephalus/ogac</i> (100%)   |
| FM024 | Grouper ( <i>Epinephelus</i> sp. / <i>Plectropomus</i> sp.) | <b>313/658 bp:</b> <i>Epinephelus areolatus</i> (100%)                                                                  |
| FM025 | Alaskan pollock fillet ( <i>Gadus chalcogrammus</i> )       | <b>313/658 bp:</b> <i>Gadus chalcogrammus/Theragra finnmarchica</i> (99.68%/99.85%)                                     |
| FM026 | Crab leg meat ( <i>Brachyura</i> sp.)                       | <b>313/658 bp:</b><br><i>Monomia gladiator</i> (98.74%/99.26 %)                                                         |
| FM028 | Threadfin head-bone ( <i>Polynemidae</i> sp.)               | <b>313/658 bp:</b> <i>Leptomelanosoma indicum</i> (100%)                                                                |
| FM029 | Wild pacific sole ( <i>Soleidae</i> sp.)                    | <b>313/658 bp:</b> <i>Leptoidopsetta polyxstra</i> (100%)                                                               |
| FM030 | Batang fillet slice ( <i>Scomberomorus</i> sp.)             | <b>313/658 bp:</b> <i>Scomberomorus commerson</i> (99.68%/99.85%)                                                       |
| FM031 | Toman ( <i>Channa micropeltes</i> )                         | <b>313/658 bp:</b> <i>Channa micropeltes</i> (100%)                                                                     |
| FM032 | Cod morue ( <i>Gadus morhua</i> )                           | <b>313 bp:</b> <i>Gadus macrocephalus/ogac/morhua</i> (99.68%)<br><b>658 bp:</b> <i>Gadus macrocephalus/ogac</i> (100%) |
| FM033 | Haddock ( <i>Melanogrammus aeglefinus</i> )                 | <b>313/658 bp:</b> <i>Melanogrammus aeglefinus</i> (100%)                                                               |
| FM034 | Tilapia fillet ( <i>Oreochromis</i> sp.)                    | <b>313 bp:</b> Unsuccessful<br><b>658 bp:</b> <i>Oreochromis aureus/mossambicus/niloticus</i> (100%)                    |
| FM035 | Toman fillet slice ( <i>Channa micropeltes</i> )            | <b>313 bp:</b> Unsuccessful<br><b>658 bp:</b> <i>Channa micropeltes</i> (100%)                                          |



|       |                                                                           |                                                                                                                             |
|-------|---------------------------------------------------------------------------|-----------------------------------------------------------------------------------------------------------------------------|
| FM036 | Silver fish                                                               | <b>313 bp:</b> <i>Protosalanx hyalocranius</i> (100%)<br><b>658 bp:</b> <i>Protosalanx chinensis/hyalocranius</i> (100%)    |
| FM037 | Tuna in salt ( <i>Thunnus</i> sp.)                                        | <b>313 bp:</b> <i>Thunnus atlanticus/albacres /tonggol</i> (100%)<br><b>658 bp:</b> Unsuccessful                            |
| FM038 | Toman slice ( <i>Channa micropeltes</i> )                                 | <b>313 bp:</b> Unsuccessful<br><b>658 bp:</b> <i>Channa micropeltes</i> (99.54%)                                            |
| FM043 | Wild cod morue ( <i>Gadus morhua</i> )                                    | <b>313 bp:</b> <i>Gadus macrocephalus/ogac/morhua</i> (100%)<br><b>658 bp:</b> <i>Gadus macrocephalus/ogac</i> (99.85%)     |
| FM044 | Bay scallop meat ( <i>Argopecten irradians</i> )                          | <b>313 bp:</b> <i>Argopecten irradians</i> (100%)<br><b>658 bp:</b> Unsuccessful                                            |
| FM045 | Frozen red snapper fillet ( <i>Lutjanus</i> sp.)                          | <b>313/658 bp:</b> <i>Lutjanus vitta</i> (99.82%)                                                                           |
| FM046 | Frozen grouper fillet ( <i>Epinephelus</i> sp. / <i>Plectropomus</i> sp.) | <b>313 bp:</b> Unsuccessful<br><b>658 bp:</b> <i>Epinephelus areolatus</i> (97.58%)                                         |
| FM048 | Grouper fillet ( <i>Epinephelus</i> sp. / <i>Plectropomus</i> sp.)        | <b>313/658 bp:</b> <i>Epinephelus areolatus</i> (100%)                                                                      |
| FM050 | Red snapper fillet ( <i>Lutjanus</i> sp.)                                 | <b>313 bp:</b> <i>Lutjanus malabaricus</i> (99.35%)<br><b>658 bp:</b> Unsuccessful                                          |
| FM051 | Threadfin fillet (Polynemidae sp.)                                        | <b>313/658 bp:</b> <i>Leptomelanosoma indicum</i> (100%)                                                                    |
| FM052 | White Fish fillet ( <i>Oreochromis</i> sp.)                               | <b>313 bp:</b> <i>Oreochromis niloticus</i> (100%)<br><b>658 bp:</b> <i>Oreochromis aureus/mossambicus/niloticus</i> (100%) |
| FM053 | Batang steak ( <i>Scomberomorus</i> sp.)                                  | <b>313/658 bp:</b> <i>Scomberomorus commerson</i> (100%)                                                                    |
| FM054 | Threadfin meat (Polynemidae sp.)                                          | <b>313/658 bp:</b> <i>Leptomelanosoma indicum</i> (100%)                                                                    |
| FM055 | Salmon fish meat (seafood from Norway) ( <i>Salmo salar</i> )             | <b>313/658 bp:</b> <i>Salmo salar</i> (100%/99.85%)                                                                         |
| FM056 | Pike conger eel ( <i>Muraenesox</i> sp.)                                  | <b>313 bp:</b> Unsuccessful<br><b>658 bp:</b> <i>Muraenesox bagio</i> (86.81%)                                              |
| FM057 | Sea bass meat ( <i>Lates calcarifer</i> )                                 | <b>313 bp:</b> Unsuccessful<br><b>658 bp:</b> <i>Lates calcifer</i> (99.85%)                                                |
| FM070 | Tasmanian salmon fillet ( <i>Salmo salar</i> )                            | <b>313 bp:</b> <i>Salmo salar</i> (100%)                                                                                    |

|       |                                                                                 |                                                                                                                       |
|-------|---------------------------------------------------------------------------------|-----------------------------------------------------------------------------------------------------------------------|
|       |                                                                                 | <b>658 bp:</b> Unsuccessful                                                                                           |
| FM071 | Batang mid cut ( <i>Scomberomorus</i> sp.)                                      | <b>313/658 bp:</b> <i>Scomberomorus commerson</i> (100%)                                                              |
| FM075 | Seasoned jellyfish                                                              | <b>313/658 bp:</b> Unsuccessful                                                                                       |
| FM076 | Flying Fish roe ( <i>Exocoetidae</i> sp.)                                       | <b>313 bp:</b> <i>Cheilopogon pitcairnsensis</i> (98.36%)<br><b>658 bp:</b> <i>Cheilopogon heterurus</i> (98.05%)     |
| FM080 | Frozen tuna portion ( <i>Thunnus</i> sp.)                                       | <b>313 bp:</b> Unsuccessful<br><b>658 bp:</b> <i>Thunnus tonggol</i> (99.85%)                                         |
| FM081 | Deep sea flounder skin on fillet ( <i>Pleuronectoidei</i> sp.)                  | <b>313/658 bp:</b> <i>Atheresthes stomias</i> (100%/99.68%)                                                           |
| FM082 | Frozen snakehead fillet ( <i>Channa striata</i> / <i>Channa micropeltes</i> )   | <b>313 bp:</b> Unsuccessful<br><b>658 bp:</b> <i>Channa micropeltes</i> (100%)                                        |
| FM088 | Norwegian Salmon ( <i>Salmo salar</i> / <i>Onchorhynchus</i> sp.)               | <b>313/658 bp:</b> <i>Salmo salar</i> (100%)                                                                          |
| FM089 | Toman fillet slice ( <i>Channa micropeltes</i> )                                | <b>313/658 bp:</b> <i>Channa micropeltes</i> (99.68%/99.83%)                                                          |
| FM096 | Prawn meat ( <i>Penaeidae</i> sp.)                                              | <b>313 bp:</b> <i>Metapenaeopsis barbata</i> (98.72%)<br><b>658 bp:</b> Unsuccessful                                  |
| FM097 | Red snapper fillet with skin on ( <i>Lutjanus</i> sp.)                          | <b>313/658 bp:</b> <i>Lutjanus vitta</i> (96.8%/99.69%)                                                               |
| FM098 | Grouper fillet with skin on ( <i>Epinephelus</i> sp. / <i>Plectropomus</i> sp.) | <b>313 bp:</b> <i>Epinephelus sexfasciatus</i> (100%)<br><b>658 bp:</b> Unsuccessful                                  |
| FM099 | Frozen prepared Squid ( <i>Cephalopoda</i> sp.)                                 | <b>313/658 bp:</b> Unsuccessful                                                                                       |
| FM100 | Red grouper slices ( <i>Plectropomus</i> sp.)                                   | <b>313 bp:</b> <i>Plectropomus leopardus</i> (100%)<br><b>658 bp:</b> Unsuccessful                                    |
| FM101 | Toman slices ( <i>Channa micropeltes</i> )                                      | <b>313 bp:</b> Unsuccessful<br><b>658 bp:</b> <i>Channa micropeltes</i> (99.85%)                                      |
| FM102 | Frozen grouper fillet ( <i>Epinephelus</i> sp. / <i>Plectropomus</i> sp.)       | <b>313 bp:</b> <i>Epinephelus sexfasciatus</i> (100%)<br><b>658 bp:</b> Unsuccessful                                  |
| FM103 | Alaska cod ( <i>Gadus</i> sp.)                                                  | <b>313 bp:</b> <i>Gadus macrocephalus/ogac/morhua</i> (100%)<br><b>658 bp:</b> <i>Gadus macrocephalus/ogac</i> (100%) |

|           |                                                         |                                                                                                                                                             |
|-----------|---------------------------------------------------------|-------------------------------------------------------------------------------------------------------------------------------------------------------------|
| FM104     | Wild cod morue ( <i>Gadus morhua</i> )                  | <b>313 bp:</b> Unsuccessful<br><b>658 bp:</b> <i>Gadus macrocephalus/ogac</i> (99.85%)                                                                      |
| FM105     | Frozen bay scallop meat ( <i>Argopecten irradians</i> ) | <b>313 bp:</b> <i>Argopecten irradians</i> (100%)<br><b>658 bp:</b> Unsuccessful                                                                            |
| Ambiguous |                                                         |                                                                                                                                                             |
| FM095     | Frozen scallop (Pectinidae sp.)                         | <b>313 bp:</b> 3/5 reads match to <i>Pecten</i> sp- thus this is likely to be correct<br><b>658 bp:</b> <i>Litopenaeus vannamei/Penaeus vannamei</i> (100%) |

Table 4: Single-species samples of seafood products obtained from restaurants in Singapore. Ambiguities in identification are separated by slashes.

| Seafood sold/marketed as: (expected species) |                                                                                         | ID of barcode (best match %)                                                     |
|----------------------------------------------|-----------------------------------------------------------------------------------------|----------------------------------------------------------------------------------|
| FM058                                        | Eel Sushi Roll ( <i>Anguilla</i> sp.)                                                   | <b>313 bp:</b> Unsuccessful<br><b>658 bp:</b> <i>Anguilla anguilla</i> (100%)    |
| FM059                                        | Salmon Roll ( <i>Salmo salar</i> / <i>Onchorhynchus</i> sp.)                            | <b>313/658 bp:</b> <i>Onchorhynchus keta</i> (100%/99.84%)                       |
| FM060                                        | Scallop (Pectenidae sp.)                                                                | <b>313/658 bp:</b> Unsuccessful                                                  |
| FM061                                        | Red Sea Bream/Amberjack ( <i>Pagrus</i> sp. / <i>Pagellus</i> sp. / <i>Seriola</i> sp.) | <b>313 bp:</b> <i>Pagrus major/auratus</i> (100%)<br><b>658 bp:</b> Unsuccessful |
| FM062                                        | Yellow Fin Tuna ( <i>Thunnus albacares</i> )                                            | <b>313 bp:</b> Unsuccessful<br><b>658 bp:</b> <i>Thunnus albacares</i> (99.85%)  |
| FM063                                        | Red Sea Bream/Amberjack ( <i>Pagrus</i> sp. / <i>Pagellus</i> sp. / <i>Seriola</i> sp.) | <b>313/658 bp:</b> <i>Seriola dumerili</i> (100%/99.85%)                         |
| FM064                                        | Northern Spot Prawn ( <i>Pandalus platyceros</i> )                                      | <b>313 bp:</b> Unsuccessful<br><b>658 bp:</b> <i>Pandalus borealis</i> (100%)    |
| FM065                                        | Salmon ( <i>Salmo salar</i> / <i>Onchorhynchus</i> sp.)                                 | <b>313/658 bp:</b> <i>Salmo salar</i> (100%/99.69%)                              |
| FM066                                        | Eel Sushi ( <i>Anguilla</i> sp.)                                                        | <b>313/658 bp:</b> <i>Anguilla japonica/anguilla</i> (100%/99.85%)               |
| FM067                                        | Codroe with Kelp ( <i>Gadus morhua</i> )                                                | <b>313 bp:</b> <i>Gadus macrocephalus/ogac/morhua</i> (100%)                     |

|       |                                                                               |                                                                                                                    |
|-------|-------------------------------------------------------------------------------|--------------------------------------------------------------------------------------------------------------------|
|       |                                                                               | <b>658 bp:</b> <i>Gadus macrocephalus/ogac</i> (99.85%)                                                            |
| FM068 | Yellowfin tuna ( <i>Thunnus albacares</i> )                                   | <b>313 bp:</b> <i>Thunnus atlanticus/albacres/tonggol</i> (100%)<br><b>658 bp:</b> <i>Thunnus albacares</i> (100%) |
| FM069 | Golden Cuttlefish ( <i>Sepia esculenta/ Sepia elliptica</i> )                 | <b>313 bp:</b> <i>Sepia prashadi/pharaonis/ramani</i> (99.68%)<br><b>658 bp:</b> <i>Sepia pharaonis</i> (99.84%)   |
| FM084 | Salmon ( <i>Salmo salar / Onchorhynchus</i> sp.)                              | <b>313/658 bp:</b> <i>Salmo salar</i> (100%/99.69%)                                                                |
| FM085 | Swordfish ( <i>Xiphias gladius</i> )                                          | <b>313/658 bp:</b> <i>Xiphias gladius</i> (100%)                                                                   |
| FM086 | Bluefin tuna/Skipjack Tuna ( <i>Thunnus</i> sp. / <i>Katsuwonus pelamis</i> ) | <b>313 bp:</b> <i>Thunnus obesus/atlanticus/albacares</i> (100%)<br><b>658 bp:</b> <i>Thunnus obesus</i> (99.85%)  |
| FM087 | Bluefin tuna/Skipjack Tuna ( <i>Thunnus</i> sp. / <i>Katsuwonus pelamis</i> ) | <b>313/658 bp:</b> <i>Katsuwonus pelamis</i> (100%/99.85%)                                                         |
| FM090 | Tara kirmi (cod fish fillet) ( <i>Gadus</i> sp.)                              | <b>313/658 bp:</b> <i>Gadus macrocephalus/ogac</i> (100%)                                                          |
| FM091 | Kajiki kirmi (swordfish fillet) ( <i>Xiphias gladius</i> )                    | <b>313/658 bp:</b> <i>Xiphias gladius</i> (100%)                                                                   |
| FM092 | Gindara kirmi (black cod fillet) ( <i>Anoplopoma fimbria</i> )                | <b>313/658 bp:</b> <i>Anoplopoma fimbria</i> (100%)                                                                |
| FM093 | Buri kirmi (Yellowtail fillet) ( <i>Seriola quinqueradiata</i> )              | <b>313 bp:</b> Unsuccessful<br><b>658 bp:</b> <i>Seriola lalandi/quinqueradiata</i> (100% - 99.66%)                |
| FM094 | Seasoned cod roe ( <i>Gadus morhua</i> )                                      | <b>313/658 bp:</b> <i>Gadus chalcogrammus/Theragra finnmarchica</i> (100%/100% - 99.23%)                           |

634 Table 5: Mixed-species samples obtained from supermarkets in Singapore. Ambiguities in identification are separated by slashes.

| Seafood sold/marketed as: (expected species/ingredients listed) |                                                  | ID of barcodes (best match %)                                                                                                                                                                                                                                                                                                                                |
|-----------------------------------------------------------------|--------------------------------------------------|--------------------------------------------------------------------------------------------------------------------------------------------------------------------------------------------------------------------------------------------------------------------------------------------------------------------------------------------------------------|
| Pig DNA detected                                                |                                                  |                                                                                                                                                                                                                                                                                                                                                              |
| FM001                                                           | Prawn Ball (Penaeidae sp. unknown fish, Sepiida) | <b>313 bp:</b><br><i>Sepia pharaonis/prashadi/ramani</i> (100%)<br><i>Sus scrofa</i> (99.68%)<br><i>Trichiurus gangeticus/lepturus</i> (100%)<br><b>658 bp:</b><br><i>Lutjanus lutjanus</i> (99.85%)<br><i>Nemipterus mesoprion/randalli</i> (100%)<br><i>Priacanthus macracanthus</i> (100%)<br><i>Sepia pharaonis</i> (99.85%)<br><i>Sus scrofa</i> (100%) |
| FM002                                                           | Cuttlefish Ball (unknown fish, Sepiida)          | <b>313 bp:</b><br><i>Sus scrofa</i> (100%)<br><i>Sepia prashadi/pharaonis/ramani</i> (98.74%)<br><i>Trichiurus gangeticus/lepturus</i> (99.68%)<br><b>658 bp:</b><br><i>Nemipterus mesoprion/randalli</i> (99.71%)<br><i>Sus scrofa</i> (100%)<br><i>Sepia pharaonis/ramani</i> (99.87%)                                                                     |
| FM016                                                           | Cuttlefish Ball (Unknown fish, Sepiida)          | <b>313 bp:</b><br><i>Nemipterus mesoprion/randalli</i> (100%)<br><i>Sepiella japonica</i> (99.68%)<br><b>658 bp:</b><br><i>Nemipterus mesoprion/randalli</i> (100%)<br><i>Sepia pharaonis/ramani</i> (99.85%)<br><i>Sus scrofa</i> (99.85%)                                                                                                                  |
| FM078                                                           | Cuttlefish Balls (Unknown fish, Sepiida)         | <b>313 bp:</b>                                                                                                                                                                                                                                                                                                                                               |



|                            |                                                                                             |                                                                                                                                                                                                                                                                                                                                  |
|----------------------------|---------------------------------------------------------------------------------------------|----------------------------------------------------------------------------------------------------------------------------------------------------------------------------------------------------------------------------------------------------------------------------------------------------------------------------------|
|                            |                                                                                             | <i>Sepia prashadi/pharaonis/ramani</i> (100%)<br><b><i>Sus scrofa</i> (100%)</b><br><i>Sepiella japonica</i> (100%)<br><b>658 bp:</b><br><i>Sepia pharaonis/ramani</i> (99.87%)<br><i>Nemipterus mesoprion/randalli</i> (100%)<br><b><i>Sus scrofa</i> (99.71%)</b>                                                              |
| FM079                      | Prawn Balls (Unknown fish, Sepiida, Penaeidae)                                              | <b>313 bp:</b><br><i>Nemipterus mesoprion/randalli</i> (100%)<br><i>Sepiella inermis</i> (100%)<br><b>658 bp:</b><br><i>Nemipterus mesoprion/randalli</i> (100%)<br><i>Sepia pharaonis</i> (100%)<br><b><i>Sus scrofa</i> (99.71%)</b><br><i>Priacanthus tayenus</i> (99.79%)                                                    |
| Key ingredient not present |                                                                                             |                                                                                                                                                                                                                                                                                                                                  |
| FM003                      | Crab Stick (Brachyura, sp. unknown fish)                                                    | <b>313 bp:</b><br><i>Nemipterus mesoprion/randalli</i> (99.68%)<br><i>Scolopsis taenioptera</i> (99.68%)<br><b>658 bp:</b><br><i>Dussumieria acuta</i> (100%)<br><i>Nemipterus mesoprion/randalli</i> (100%)<br><i>Pentapodus setosus</i> (100%)<br><i>Priacanthus macracanthus</i> (99.87%)<br><i>Upeneus margartha</i> (99.75) |
| FM007                      | Flavoured Crab Ball (Brachyura sp., Surimi, Threadfin Bream ( <i>Nemipterus virgatus</i> )) | <b>313 bp:</b><br>Unsuccessful<br><b>658 bp:</b><br><i>Atule mate</i> (100%)                                                                                                                                                                                                                                                     |

|       |                                                                        |                                                                                                                                                                                                                                                                                                                                                                                                                                                                                                                                                                    |
|-------|------------------------------------------------------------------------|--------------------------------------------------------------------------------------------------------------------------------------------------------------------------------------------------------------------------------------------------------------------------------------------------------------------------------------------------------------------------------------------------------------------------------------------------------------------------------------------------------------------------------------------------------------------|
|       |                                                                        | <i>Decapterus maruadsi</i> (100%)<br><i>Jaydia striata/trunctata</i> (100%)<br><i>Parastromateus niger</i> (99.85%)<br><i>Liza parsia/melinoptera</i> (100%)<br><i>Psettodes erumei</i> (100%)<br><i>Scolopsis taenioptera</i> (100%)<br><i>Scomberomorus commerson</i> (100%)<br><i>Sphyræna flavicauda</i> (99.54%)<br><i>Lutjanus lutjanus</i> (100%)<br><i>Saurida macrolepis/tumbil</i> (99.75%)<br><i>Siganus fuscescens/canaliculatus</i> (100%)<br><i>Terapon jarbua</i> (100%)<br><i>Trichiurus lepturus</i> (100%)<br><i>Upeneus sulphureus</i> (99.85%) |
| FM010 | Breaded Fish Fingers (Threadfin Bream ( <i>Nemipterus japonicus</i> )) | <b>313 bp:</b><br><i>Sardinella jussieu</i> (99.33%)<br><i>Selar crumenophthalmus</i> (100%)<br><b>658 bp:</b><br><i>Priacanthus hamrur/prolixis/tayenus</i> (100%)                                                                                                                                                                                                                                                                                                                                                                                                |
| FM039 | Lobster Ball (Decapod sp., Unknown fish)                               | <b>313 bp:</b><br><i>Nemipterus furcosus</i> (99.04%)<br><i>Priacanthus macracanthus</i> (99.68%)<br><i>Melanogrammus aeglefinus</i> (100%)<br><b>658 bp:</b><br><i>Scolopsis taenioptera</i> (100%)<br><i>Nemipterus marginatus</i> (99.74%)<br><i>Priacanthus macracanthus</i> (99.87%)                                                                                                                                                                                                                                                                          |
| FM040 | Crab Stick ( <i>Brachyura</i> sp., Unknown fish)                       | <b>313 bp:</b><br><i>Nemipterus mesoprion/randalli</i> (100%)                                                                                                                                                                                                                                                                                                                                                                                                                                                                                                      |

|       |                                                                                                                  |                                                                                                                                                                                                                                                                                             |
|-------|------------------------------------------------------------------------------------------------------------------|---------------------------------------------------------------------------------------------------------------------------------------------------------------------------------------------------------------------------------------------------------------------------------------------|
|       |                                                                                                                  | <i>Upeneus sulphureus</i> (98.71%)<br><b>658 bp:</b><br><i>Nemipterus mesoprion/randalli</i> (100%)/<br><i>Priacanthus hamrur/prolixus</i> (99.87%)<br><i>Scolopsis taenioptera</i> (100%)<br><i>Upeneus sulphureus</i> (98.90%)                                                            |
| FM047 | Crab Leg (Brachyura sp., Threadfin bream ( <i>Nemipterus</i> sp., Alaska Pollock ( <i>Gadus chalcogrammus</i> )) | <b>313 bp:</b><br><i>Gadus chalcogrammus/ Theragra finnmarkica</i> (100%)<br><i>Nemipterus mesoprion/randalli</i> (100%)<br><b>658 bp:</b><br><i>Gadus chalcogrammus/ Theragra finnmarkica</i> (100%)<br><i>Nemipterus mesoprion/randalli</i> (100%)                                        |
| FM083 | Crab leg (Unknown fish, Brachyura sp.)                                                                           | <b>313 bp:</b><br><i>Priacanthus hamrur/prolixus</i> (100%)<br><b>658 bp:</b><br>Unsuccessful                                                                                                                                                                                               |
| Clean |                                                                                                                  |                                                                                                                                                                                                                                                                                             |
| FM042 | Cuttlefish Ball (Unknown fish, Sepiida)                                                                          | <b>313 bp:</b><br><i>Scolopsis taenioptera</i> (100%)<br><i>Sepia pharaonis</i> (99.68%)<br><i>Trichiurus gangeticus/lepturus</i> (100%)<br><b>658 bp:</b><br><i>Lepturacanthus salava</i> (100%)<br><i>Priacanthus macracanthus</i> (100%)<br><i>Upeneus vittatus/supravittatus</i> (100%) |
